# 1 **Attained body mass index among children attending outdoor or** 2 **conventional kindergartens**

3 Sofus C. Larsen, PhD<sup>a</sup>, Jeanett F. Rohde, PhD<sup>a</sup>, Nanna J. Olsen, PhD<sup>a</sup>, Jane N. Østergaard, PhD<sup>b</sup>,  
4 Berit L. Heitmann, PhD<sup>a,c,d</sup>, Ina O. Specht, PhD<sup>a</sup>.

5 <sup>a</sup> Research Unit for Dietary Studies, The Parker Institute, Bispebjerg and Frederiksberg Hospital, The  
6 Capital Region, Frederiksberg, Denmark.

7 <sup>b</sup> Steno Diabetes Center Aarhus, Aarhus University Hospital, Aarhus, Denmark.

8 <sup>c</sup> The Boden Collaboration, Charles Perkins Centre, The University of Sydney, Sydney, NSW,  
9 Australia

10 <sup>d</sup> Department of Public Health, Section for General Practice, University of Copenhagen,  
11 Copenhagen, Denmark

12 **Key words:** Obesity, Body Mass Index, Kindergarten, Outdoor Kindergarten

13 **Running title:** Outdoor kindergartens and attained body mass index

14 **Correspondence:** Sofus C. Larsen; Research Unit for Dietary Studies at The Parker Institute;  
15 Frederiksberg Hospital; Nordre Fasanvej 57, Vej 8, indgang 11; 2000 Frederiksberg; Denmark; E-  
16 mail: [sofus.larsen@regionh.dk](mailto:sofus.larsen@regionh.dk)

17 **Word count:** 2950

18 **Funding:** The study was funded by grants from *Den A P Møllerske Støttefond* (grand no.: 12408),  
19 *Helsefonden* (grand no.: 19-B-0079), Rosalie Petersens Fond (grand no.: 020432-0001), Beckett-  
20 Fonden (grand no.: 20-2-6761) and Aase og Ejnar Danielsens Fond (grand no.: 21.5.2019). The  
21 Parker Institute is supported by a core grant from the Oak Foundation (grant agreement number  
22 OCAY-18-774-OFIL). Dr. Østergaard is employed at Steno Diabetes Center Aarhus, a public  
23 hospital and research institution situated in Central Denmark Region, which is partly funded by a  
24 grant from the Novo Nordisk Foundation. The funders had no role in study design, data collection  
25 and analysis, decision to publish, or preparation of the manuscript.

26 **Conflicts of interest:** Sofus C. Larsen and Nanna J. Olsen have no conflicts of interest relevant to  
27 this article to disclose. Jeanett F. Rohde have had two children enrolled in an outdoor kindergarten.  
28 Jane N. Østergaard have had three children enrolled in a conventional kindergarten. Berit L.  
29 Heitmann have had two children enrolled in an outdoor kindergarten. Ina O. Specht have had one  
30 child enrolled in an outdoor kindergarten and one child enrolled in a conventional kindergarten.

31 **Article Summary:** This study examined whether children in outdoor kindergartens had a lower risk  
32 of overweight after school entrance compared to children in conventional kindergartens.

33 **Data availability statement:** Data is stored on a secured server at Statistics Denmark  
34 (<https://www.dst.dk/en/>). Due to Danish legislation, the individual □ level data used in the present  
35 study cannot be made available.

36 **Author contributions:** Sofus C. Larsen, conceptualized study, created dataset, carried out statistical  
37 analyses and drafted the initial statistical analysis plan and manuscript.  
38 Nanna J. Olsen and Jane N. Østergaard critically reviewed and revised statistical analysis plan and  
39 manuscript. Berit L. Heitmann and Ina O. Specht conceptualized study, acquired funding for the  
40 project and critically reviewed and revised statistical analysis plan and manuscript.

41 **ABSTRACT**

42 **BACKGROUND:** Studies have shown that outdoor activities are inversely associated with adiposity,  
43 but little is known about outdoor kindergartens as a potential intervention for healthy weight  
44 development.

45 **METHODS:** We included 1544 children from outdoor kindergartens and 1640 from conventional  
46 kindergartens. Anthropometry was measured by school health nurses when the children were 6 to 8  
47 years old. The first available measure of attained body mass index z-score (BMIz) after school  
48 entrance was included as the primary outcome. Risk of attaining overweight (including obesity) was  
49 included as a secondary outcome. Register-based information was available on potential confounding  
50 factors. Regression models were constructed to examine differences in study outcomes between  
51 children attending outdoor or conventional kindergartens.

52 **RESULTS:** Our basic models, with information on outcome, kindergarten type and birth weight,  
53 showed a borderline statistically significantly lower attained BMIz (-0.07 [95% CI: -0.14, 0.00],  
54 P=0.060) and a lower risk of overweight (adjusted risk ratio: 0.83 [95% CI: 0.72, 0.97], P=0.016)  
55 among children attending outdoor kindergartens compared to conventional kindergartens. When  
56 adjusting for sociodemographic factors and parental BMI, there was no evidence of differences in  
57 attained BMIz (P=0.153) or overweight (P=0.967).

58 **CONCLUSION:** Our results do not support outdoor kindergartens as an intervention for healthy  
59 weight development.

60

## 61 **Study importance questions**

### 62 **What is already known about this subject?**

- 63 • One of the many suggested explanations for the increased prevalence of childhood obesity is
- 64 a decline in children's outdoor activities.
- 65 • Previous studies have shown outdoor activities to be inversely associated with adiposity.
- 66 • Little is known about outdoor kindergartens as a potential structural intervention for healthy
- 67 weight development.

68

### 69 **What are the new findings in your manuscript?**

- 70 • Our crude analysis suggested a lower risk of attained overweight after school entry among
- 71 children in outdoor kindergartens than children in conventional kindergartens.
- 72 • After adjusting for potential confounding from parental BMI and sociodemographic factors,
- 73 we found no evidence of differences in attained BMIz or overweight among children
- 74 attending outdoor or conventional kindergartens.

75

### 76 **How might your results change the direction of research or the focus of clinical practice?**

- 77 • Our results do not support outdoor kindergartens as a potential intervention for healthy
- 78 weight development.
- 79 • These results highlight the importance of adjusting for potential confounding factors when
- 80 examining the relationship between outdoor activities and childhood obesity.
- 81 • Given the observational design of the study, our results should be interpreted with caution,
- 82 and randomized trials are warranted to confirm our findings.

## 83 **BACKGROUND**

84 Between 1975 and 2016, the global prevalence of obesity among children and adolescents has  
85 increased from 0.9% to 7.8% among boys and from 0.7% to 5.6% among girls [1]. This has raised  
86 serious public health concerns, as childhood obesity is associated with both short- and long-term  
87 health consequences, including negative self-evaluation, bullying, social stigma, poor academic  
88 performance, symptoms of depression or anxiety [2, 3], numerous physical comorbidities [4] and an  
89 increased risk of mortality both in early [5] and later adulthood [6]. Once childhood obesity is  
90 established it is difficult to reverse [7] and children with obesity often grow up to be adults with  
91 obesity [8], strengthening the case for early intervention. However, the effect of existing prevention  
92 interventions are modest at best [9], indicating that alternative approaches may be needed to  
93 effectively promote healthy weight development in childhood .

94 One of the many suggested explanations for the increased prevalence of childhood obesity is a  
95 decline in children’s outdoor activities [10]. In support of this, some cross-sectional studies have  
96 shown both outdoor play time and the quality of the outdoor environment to be inversely associated  
97 with childhood body mass index (BMI), waist circumference and risk of obesity [11-14]. While the  
98 evidence from longitudinal studies is limited, results based on 2810 children from the *Child*  
99 *Experiences Survey 2006* cohort suggested that outdoor play time was associated with decreases in  
100 children’s BMI over the course of a preschool year [12]. Likewise, Armstrong and colleagues (2015)  
101 showed a higher density of parks or other recreational locations to be associated with a decrease in  
102 BMI z-score (BMIz) over time among 93 children with overweight involved in a family-based  
103 weight management intervention [15]. However, even though many of the published studies suggest  
104 some beneficial effects of outdoor activities on adiposity among children, the evidence is far from  
105 consistent, as pointed out in a recent systematic review on the relationship between nature exposure  
106 and different measures of childhood health [11]. In addition, there is a need to develop and evaluate  
107 interventions that can be implemented at a larger scale and in a cost-effective manner.

108 An ideal setting for conducting childhood interventions is the kindergarten, where many children  
109 spend a large part of their daily lives and may establish some of the habits and health behaviors that  
110 can track into later childhood and adulthood [16]. Larger cities in Denmark and the other  
111 Scandinavian countries have two different types of kindergartens: 1) the conventional kindergarten  
112 where the children have access to playgrounds but also spend some of their day indoor, and 2) the  
113 outdoor kindergarten where most or all of the day is spent playing outside, often in a forest setting  
114 environment [17]. In a pre-test-post-test study of 74 children with accelerometer measured  
115 information on physical activity, we have previously shown that children are more physically active  
116 in an outdoor kindergarten setting than in a conventional kindergarten setting [18]. However, the  
117 potential benefits of the Danish outdoor kindergartens on promotion of healthy weight development  
118 have not been thoroughly investigated.

119 Combined with the unique Danish health registers and systematic measurements of height and  
120 weight performed by school health nurses, we had a unique opportunity to examine outdoor  
121 kindergartens as a potential intervention setting for preventing development of overweight later in  
122 childhood. Our primary objective was to examine whether children in outdoor kindergartens had  
123 attained a lower BMIz and risk of overweight (including obesity) after school entrance compared to  
124 children in conventional kindergartens, based on the first available measure of outcome recorded by  
125 school health nurses when children were aged between 6 and 8 years. As secondary objectives, we  
126 examined potential effect modification by socioeconomic status, and the trajectories of attained  
127 BMIz and risk of overweight at 6, 7 and 8 years of age for children in outdoor kindergartens and  
128 conventional kindergartens.

## 129 **MATERIALS AND METHODS**

### 130 **Study design**

131 The present study was part of the '*Outdoor kindergartens - the healthier choice?*' (ODIN) project,  
132 where data was obtained from conventional kindergartens with many indoor activities, and outdoor

133 kindergartens where most or all of the daily activities took place outside [17]. We had information on  
134 a total of 5077 children from the two largest municipalities in Denmark (Aarhus and Copenhagen),  
135 comprising all children who attended outdoor kindergartens (n=2434) and a sub-set of children who  
136 attended conventional kindergartens (n=2643). Data from outdoor and conventional kindergartens  
137 was obtained from the same areas of parental residence. In the primary analysis, we excluded all  
138 participants with missing data on one or more covariates (n=729) or follow-up information on  
139 outcome (n=1164), resulting in a total of 3184 children for the complete case analysis. In total, 1544  
140 of these children were from outdoor kindergartens and 1640 were from conventional kindergartens.  
141 A flowchart illustrating inclusion/exclusion of individuals can be found in the supporting information  
142 (**Figure S1**).

#### 143 **Ethical considerations**

144 Permission from the two municipalities to send information to Statistics Denmark was granted.  
145 Ethical permission was decided not to be relevant by the Ethical Committee of the Capital Region of  
146 Denmark (journal nr.: H-19053587). Permission from the Capital Region Data Agency and the  
147 Danish Patient Safety Authority was granted (Journal nr.: P-2020-54 and 31-1521-8, respectively).

#### 148 **Outcomes**

149 Height and weight were measured by school health nurses when the children were 6 to 8 years old.  
150 BMI was calculated as weight in kilograms per height in meters squared. We then generated BMIz  
151 using a power transformation in increments of 0.1 years, applying national reference scores to the  
152 study population [19]. The first available measure of attained BMIz was included as our primary  
153 outcome, while the first available measure of attained overweight (including obesity) (defined as a  
154 BMIz>1 [yes/no]) was included as a secondary outcome.

155

156 **Covariates**

157 Gender of the child (boys/girls), birth weight (g), preterm birth (yes/no), maternal age (years),  
158 maternal pre-pregnancy BMI (kg/m<sup>2</sup>) and information on maternal smoking during pregnancy  
159 (yes/no) was obtained from the *Danish Medical Birth Register*. Information on maternal education  
160 was obtained from *Statistics Denmark* and included in the present study as *basic* (basic school 8th–  
161 10th class), *short* (general upper–secondary education, short-cycle higher education or vocational  
162 education and training), *medium* (medium-cycle higher education or bachelor), and *long* (long-cycle  
163 education and PhD). Information on maternal country of origin (Western/non-Western) was also  
164 obtained from *Statistics Denmark*. Age at kindergarten enrolment (years) and total time spent in  
165 kindergarten (years) was obtained from the municipalities.

166 *Additional covariates only included in sensitivity analyses*

167 Information on paternal education and country of origin was obtained from *Statistics Denmark* and  
168 included the same categories as for maternal education and country of origin. In addition to birth  
169 weight, a subset of 2681 children had weight and length measured during the first year of life by  
170 health nurses at the home of the child. From this information, we included the last available measure  
171 of BMIz prior to kindergarten enrolment.

172 **Statistical analysis**

173 A detailed statistical analysis plan, including estimates of power and precision, was circulated with  
174 all authors prior to conducting any statistical analyses (**Text S1**).

175 Linear regression models were constructed to examine the mean difference in BMIz between  
176 children in outdoor kindergartens and conventional kindergartens based on the first recorded measure  
177 after school entry. We constructed a basic model with information on BMIz, kindergarten type and  
178 birth weight, and a fully adjusted model with added information on maternal age, maternal  
179 education, maternal country of origin, maternal smoking during pregnancy, maternal pre-pregnancy

180 BMI, preterm birth, the child's age at kindergarten enrolment, and total number of years spent in  
181 kindergarten.

182 Using the same adjustment strategy, we constructed logistic regression models to examine the risk of  
183 attaining overweight among children in outdoor kindergartens compared to conventional  
184 kindergartens based on the first recorded measure after school entry. We used the STATA  
185 postestimation command *adjrr* to attain adjusted estimates of absolute risks in addition to adjusted  
186 risk differences (aRD) and adjusted risk ratios (aRR) with corresponding 95% confidence intervals  
187 (95% CI) [20].

#### 188 *Between group differences in subgroups with low or high levels of maternal education*

189 Low socioeconomic status is a strong predictor of childhood obesity [21] and previous results from  
190 the ODIN project have shown parental education to be higher for children attending outdoor  
191 kindergartens [22]. Thus, in addition to adjustment for maternal education, we conducted subgroup  
192 analyses specifically for children of mothers with a low level of education (defined as mothers with a  
193 basic or short education) and a high level of education (defined as mothers with a medium or long  
194 education). Effect modification by maternal education level was tested by adding the new 2-category  
195 education variable and a product term (kindergarten type  $\times$  education) to the fully adjusted models  
196 after removing the original 4-category education variable.

#### 197 *Trajectories of attained BMIz and overweight*

198 The same overall strategy was used to explore trajectories of attained BMIz and overweight at  
199 specific ages after school entry (6, 7 and 8 years of age). These analyses were restricted to children  
200 with at least one measurement of BMIz at 6 years of age. A last observation carried forward  
201 approach was then used for children with missing information at 7 and/or 8 years of age.

202



203 *Sensitivity analyses*

204 Since BMIz considers differential BMI trajectories by sex and age, we did not include sex as a  
205 potential confounder. However, effect modification of sex was tested by adding the variable *sex* and  
206 a product term (kindergarten type  $\times$  sex) to the fully adjusted models.

207 We had no baseline measure of outcome available, but in addition to birth weight, most of the  
208 children had weight and length measured during the first year of life. From this, we added the last  
209 available measure of BMIz prior to kindergarten enrolment as a covariate.

210 We used maternal education as a proxy for the child's SES. Similarly, we used maternal country of  
211 origin as a proxy for the geographical origin of the child. However, analyses were also conducted  
212 adding paternal information to the models.

213 We only included participants with complete information on all study variables, but as a sensitivity  
214 analysis multiple imputation by chained equations (MICE) was implemented in the complete sample  
215 of 5077 individuals.

216 Finally, we examined a potential dose–response relationship between time spent in kindergarten  
217 (continuous variable) and attained BMIz and tested for effect modification of kindergarten type by  
218 adding a product term to the model (years in kindergarten  $\times$  kindergarten type).

219 All statistical tests were two-sided with a significance level at 0.05. All statistical analyses were  
220 performed using Stata/SE 16 (StataCorp LP, College Station, Texas, USA). Figures were produced  
221 using SigmaPlot 13.0 (San Jose, CA, USA).

## 222 **RESULTS**

223 Characteristics of the included children can be found in **Table 1**. A total of 1544 children from  
224 outdoor kindergartens and 1640 from conventional kindergartens were included in the primary  
225 analysis. A lower proportion of girls were enrolled in outdoor kindergartens than in conventional

226 kindergartens (43.9% vs 49.2%;  $P=0.003$ ). Children in the outdoor kindergartens had a higher birth  
227 weight (3519 g [SD: 515] vs 3449 g [SD: 546];  $P<0.001$ ) and were less frequently born preterm  
228 (4.5% vs 7.1%,  $P=0.002$ ). Statistically significant between-group differences were also observed  
229 among the children's mothers, with a higher age (32.1 years [SD: 4.6] vs 31.4 [SD: 4.9];  $P<0.001$ ),  
230 lower pre-pregnancy BMI (22.4 [SD: 3.4] vs 23.1 [SD: 4.1];  $P<0.001$ ), higher proportion with a long  
231 education (46.2% vs 33.8%;  $P<0.001$ ), lower proportion with a non-Western country of origin (3.6%  
232 vs 19.8%;  $P<0.001$ ) and a lower proportion who smoked during pregnancy (6.3% vs 9.5%  $P=0.004$ )  
233 among mothers to children from outdoor kindergartens.

234 The basic models with information on outcome, kindergarten type and birth weight, showed a  
235 borderline statistically significantly lower BMIz at school entry (-0.07 [95% CI: -0.14, 0.00],  
236  $P=0.060$ ) and lower risk of overweight (aRR: 0.83 [95% CI: 0.72, 0.97],  $P=0.016$ ) among children in  
237 outdoor kindergartens compared to conventional kindergartens. However, in the full model with  
238 added information on sociodemographic factors we found no differences in BMIz (0.06 [95% CI: -  
239 0.02, 0.12],  $P=0.153$ ) or risk of overweight (aRR: 1.00 [95% CI: 0.86, 1.17],  $P=0.967$ ) (**Table 2**).

240 For both types of kindergartens, the highest BMIz after school entry was observed among children of  
241 mothers with a low level of education, but we found no effect modification by maternal education in  
242 relation to associations between kindergarten type and attained BMIz ( $P=0.512$ ) or risk of  
243 overweight ( $P=0.154$ ). In support of this, the fully adjusted models showed no between group  
244 differences in BMIz or risk of overweight in subgroups with mothers of low or high educational level  
245 (**Figure 1**). Likewise, when comparing trajectories of attained BMI z-scores or overweight at 6, 7  
246 and 8 years among children in outdoor kindergartens and conventional kindergartens, we did not find  
247 any statistically significant between-group differences (**Figure 2**).

248

249

250 *Sensitivity analyses*

251 We found no effect modification by sex in relation to BMIz ( $P=0.486$ ) or aRR of obesity ( $P=0.800$ ).  
252 After adding the last available measure of BMIz prior to kindergarten enrolment (**Table S1**) or  
253 paternal information on education and country of origin (**Table S2**) as covariates our results  
254 remained statistically non-significant. Likewise, analyses where missing information was handled  
255 through multiple imputation also remained statistically non-significant (**Table S3**). Finally, we found  
256 no association between years spend in outdoor or conventional kindergartens and attained BMIz and  
257 no evidence of effect modification by kindergarten type ( $P=0.571$ ) (**Figure S2**).

258 **DISCUSSION**

259 In a basic model with information on outcome, kindergarten type and birth weight, we found a lower  
260 risk of overweight after school entry among children in outdoor kindergartens compared to  
261 conventional kindergartens. However, when adding sociodemographic factors to the models, we  
262 found no differences in attained BMIz or risk of overweight between the two types of kindergartens.  
263 Likewise, we found no evidence that differences were modified by maternal education.

264 We have previously shown that children are more physically active in outdoor kindergartens  
265 compared to conventional kindergartens [18]. While the present study cannot confirm or refute  
266 causal effects, our results do suggest that potential effects of outdoor kindergartens on children's  
267 activity levels or other potential mediators of body weight regulation are insufficient to prevent  
268 overweight or obesity at school entry.

269 Like Denmark, outdoor kindergartens are also part of the Swedish day-care system. Based on cross  
270 sectional data, Söderström and colleagues have previously found that Swedish children attending  
271 kindergartens with a high-quality outdoor environment less frequently had overweight than those  
272 attending kindergartens with a low-quality outdoor environment [14]. However, due to the cross-  
273 sectional design and the lack of adjustment for potentially important covariates, including parental

274 BMI and socioeconomic status, the causal nature of this finding is highly uncertain. We found no  
275 previous studies directly comparing measures of attained adiposity in school aged children who had  
276 attended outdoor kindergartens and conventional kindergartens. However, as pointed out in a recent  
277 systematic review on nature and child health by Fyfe-Johnson and colleagues from 2021, only one-  
278 third of the published studies (n=45) found a lower risk of overweight among children with higher  
279 levels of nature exposure [11]. In our study, we found that children attending outdoor kindergartens  
280 had a lower risk of attaining obesity at school entry than children in conventional kindergartens  
281 before adjustment for important covariates such as familial BMI and socio-economic status. Indeed,  
282 the adjustment completely attenuated the observed associations. This further suggests that  
283 insufficient adjustment for confounding may have biased many of the previously published studies  
284 with positive results [11].

285 We also examined effect modification by maternal education, as low socioeconomic status is a  
286 strong predictor of childhood obesity [21] and previous results from the ODIN project have shown  
287 parental education to be higher among children attending outdoor kindergartens [22]. Although not  
288 specifically focused on obesity, there is also some evidence suggesting that children in low  
289 socioeconomic areas may have the greatest psychological benefits from exposure to high quality  
290 outdoor environments [23]. We found no evidence of effect modification in our analysis, but this  
291 could potentially also be due to a relatively high socioeconomic equality in the Danish population.

292 Our study has several strengths, including a prospective design with objectively measured  
293 information on study outcomes. We also had a relatively large sample size, providing us with  
294 sufficient statistical power to detect even small between-group difference in BMIz and risk of  
295 overweight. In addition, we had information on several covariates from the unique Danish health  
296 registers, including child and parental sociodemographic factors, allowing us to adjust for potential  
297 confounders.

298 On the other hand, our study also has some limitations. We had no information available on BMIz at  
299 kindergarten enrolment, which increases the risk of reverse causality. However, since we found no  
300 evidence of between group differences in the adjusted models, including the sensitivity analysis with  
301 added information on the last available measure of BMIz prior to kindergarten enrolment, it seems  
302 unlikely that adding a baseline measure of outcome to the model would have had a substantial impact  
303 on our results. We have previously shown a high degree of selection related to parental choice of  
304 kindergarten [22], and thus we can also not exclude that some unmeasured or residual confounding  
305 has remained. We had no information available on body composition, and we can therefore not rule  
306 out relevant between-group difference in attained fat or lean mass. Finally, our results originate from  
307 children attending kindergartens in two large Danish municipalities and may not be generalizable to  
308 children from other areas and we had a relatively large proportion of missing data. However, we  
309 found almost identical results when using multiple imputation to deal with missing data. Moreover,  
310 as we found no evidence of effect modification by maternal education or sex of the child it seems  
311 unlikely that results would be vastly different in Danish populations with other sociodemographic  
312 distributions.

313 In conclusion, our results do not support outdoor kindergartens as a potential intervention for healthy  
314 weight development. Given the observational design of our study, our results should be interpreted  
315 with caution, and randomized trials are warranted to confirm our findings.

316 **Table 1.** Participant characteristics of children in outdoor kindergartens versus conventional  
 317 kindergartens. Results presented as mean (SD) unless otherwise stated.

|                                                           | Outdoor kindergarten<br>(n=1544) | Conventional kindergarten<br>(n=1640) |         |
|-----------------------------------------------------------|----------------------------------|---------------------------------------|---------|
|                                                           | Mean (SD)                        | Mean (SD)                             | P-value |
| Girls, n [%]                                              | 678 (43.9)                       | 807 (49.2)                            | 0.003   |
| Age at kindergarten enrolment, years                      | 3.5 (0.9)                        | 3.6 (1.0)                             | 0.051   |
| Age at first school measurement, years                    | 6.5 (0.5)                        | 6.5 (0.5)                             | 0.572   |
| Time spent in kindergarten, years                         | 2.4 (1.0)                        | 2.3 (1.0)                             | 0.010   |
| Birth weight, g                                           | 3519 (515)                       | 3449 (546)                            | <0.001  |
| Born preterm, n [%]                                       | 70 (4.5)                         | 116 (7.1)                             | 0.002   |
| Maternal age at pregnancy, years                          | 32.1 (4.6)                       | 31.4 (4.9)                            | <0.001  |
| Maternal pre-pregnancy body mass index, kg/m <sup>2</sup> | 22.4 (3.4)                       | 23.1 (4.1)                            | <0.001  |
| Maternal education                                        |                                  |                                       |         |
| Basic, n [%]                                              | 84 (5.4)                         | 216 (13.2)                            | <0.001  |
| Short, n [%]                                              | 280 (18.1)                       | 429 (26.2)                            |         |
| Medium, n [%]                                             | 466 (30.2)                       | 441 (26.9)                            |         |
| Long, n [%]                                               | 714 (46.2)                       | 554 (33.8)                            |         |
| Maternal country of origin                                |                                  |                                       |         |
| Non-Western, n (%)                                        | 56 (3.6)                         | 324 (19.8)                            | <0.001  |
| Mother smoked during pregnancy, n (%)                     | 103 (6.7)                        | 155 (9.5)                             | 0.004   |

318

319

320

321 **Table 2.** Attained BMI z-scores and risk of overweight among children in outdoor kindergartens  
 322 versus conventional kindergartens.

|                          | Mean or % of participants (SE) |                           | Estimated difference                                 |                |
|--------------------------|--------------------------------|---------------------------|------------------------------------------------------|----------------|
|                          | Outdoor kindergarten           | Conventional kindergarten | Mean difference or aRD and aRR (95% CI)              | P-value        |
| <b>BMIz</b>              |                                |                           |                                                      |                |
| Basic model <sup>1</sup> | 0.05 (0.03)                    | 0.12 (0.03)               | -0.07 (-0.14, 0.00)                                  | 0.060          |
| Full model <sup>2</sup>  | 0.11 (0.03)                    | 0.06 (0.02)               | 0.06 (-0.02, 0.12)                                   | 0.153          |
| <b>Overweight</b>        |                                |                           |                                                      |                |
| Basic model              | 16.47% (0.93)                  | 19.77% (0.98)             | aRD: - 3.29% (-5.96, 0.63)<br>aRR: 0.83 (0.72, 0.97) | 0.016<br>0.016 |
| Full model               | 18.18% (0.99)                  | 18.13 (0.92)              | aRD: 0.06% (-2.66, 2.77)<br>aRR: 1.00 (0.86, 1.17)   | 0.967<br>0.967 |

323 Abbreviations: aRD, adjusted risk difference; aRR, adjusted risk ratio; BMIz, body mass index Z-score.

324 <sup>1</sup> Model with information on outcome, kindergarten type and birth weight.

325 <sup>2</sup> Added information maternal age, maternal education, maternal country of origin, maternal smoking during pregnancy,  
 326 maternal pre-pregnancy body mass index, born preterm, age at kindergarten enrolment, and total number of years spent  
 327 in kindergarten.

328

329

330

331

332 **Figure 1.** Attained BMI z-scores (A) and adjusted risk ratios for overweight (B) among children in  
333 outdoor kindergartens versus conventional kindergartens. Results stratified by maternal education.

334 Abbreviations: aRR, adjusted risk ratios; BMIz, body mass index Z-score; SES, socioeconomic status.

335 Low maternal education is defined as mothers with a basic or low education. High education is defined as mothers with a  
336 medium or high education.

337 Results from model with information on outcome, kindergarten type, birth weight, maternal age, maternal country of  
338 origin, maternal smoking during pregnancy, maternal pre-pregnancy body mass index, preterm birth, age at kindergarten  
339 enrolment, and total number of years spent in kindergarten.

340 Test statistics for BMIz: P-value for effect modification by education = 0.512.

341 Test statistics for aRR: P-value for effect modification by education = 0.154.

342

343 **Figure 2.** Trajectories of attained BMI z-scores (A) or overweight (B) at 6, 7 and 8 years of age  
344 among children in outdoor kindergartens versus conventional kindergartens.

345 Abbreviations: BMIz, body mass index Z-score; aRR, adjusted risk ratios

346 Results from model with information on outcome, kindergarten type, birth weight, maternal age, maternal country of  
347 origin, maternal smoking during pregnancy, maternal pre-pregnancy body mass index, preterm birth, age at kindergarten  
348 enrolment, and total number of years spent in kindergarten.

## 349 References

- 350 1. Worldwide trends in body-mass index, underweight, overweight, and obesity from 1975 to  
351 2016: a pooled analysis of 2416 population-based measurement studies in 128.9 million children,  
352 adolescents, and adults. *Lancet*. 2017;390(10113):2627-42. Epub 2017/10/17. doi: 10.1016/s0140-  
353 6736(17)32129-3. PubMed PMID: 29029897; PubMed Central PMCID: PMC5735219.
- 354 2. Sahoo K, Sahoo B, Choudhury AK, Sofi NY, Kumar R, Bhadoria AS. Childhood obesity: causes  
355 and consequences. *Journal of family medicine and primary care*. 2015;4(2):187-92. doi: 10.4103/2249-  
356 4863.154628. PubMed PMID: 25949965.
- 357 3. Puder JJ, Munsch S. Psychological correlates of childhood obesity. *Int J Obes (Lond)*. 2010;34  
358 Suppl 2:S37-43. Epub 2010/12/15. doi: 10.1038/ijo.2010.238. PubMed PMID: 21151145.
- 359 4. Lewellyn A, Simmonds M, Owen CG, Woolacott N. Childhood obesity as a predictor of  
360 morbidity in adulthood: a systematic review and meta-analysis. *Obes Rev*. 2016;17(1):56-67. Epub  
361 2015/10/07. doi: 10.1111/obr.12316. PubMed PMID: 26440472.
- 362 5. Lindberg L, Danielsson P, Persson M, Marcus C, Hagman E. Association of childhood obesity  
363 with risk of early all-cause and cause-specific mortality: A Swedish prospective cohort study. *PLoS Med*.  
364 2020;17(3):e1003078. Epub 2020/03/19. doi: 10.1371/journal.pmed.1003078. PubMed PMID: 32187177;  
365 PubMed Central PMCID: PMC7080224.
- 366 6. Park MH, Falconer C, Viner RM, Kinra S. The impact of childhood obesity on morbidity and  
367 mortality in adulthood: a systematic review. *Obes Rev*. 2012;13(11):985-1000. Epub 2012/06/27. doi:  
368 10.1111/j.1467-789X.2012.01015.x. PubMed PMID: 22731928.
- 369 7. Al-Khudairy L, Loveman E, Colquitt JL, Mead E, Johnson RE, Fraser H, et al. Diet, physical  
370 activity and behavioural interventions for the treatment of overweight or obese adolescents aged 12 to 17  
371 years. *Cochrane Database Syst Rev*. 2017;6(6):Cd012691. Epub 2017/06/24. doi:  
372 10.1002/14651858.Cd012691. PubMed PMID: 28639320; PubMed Central PMCID: PMC6481371 HF:  
373 none known. JO: none known. MM: none known. RV: none known. CO: none known. LA: none known. LE:  
374 Louisa Ells is seconded to Public Health England two days per week but undertook this review within her role  
375 as Reader in Public Health and Obesity at Teesside University. MIM: none known. KR: none known.
- 376 8. Singh AS, Mulder C, Twisk JW, van Mechelen W, Chinapaw MJ. Tracking of childhood  
377 overweight into adulthood: a systematic review of the literature. *Obes Rev*. 2008;9(5):474-88. Epub  
378 2008/03/12. doi: 10.1111/j.1467-789X.2008.00475.x. PubMed PMID: 18331423.
- 379 9. Brown T, Moore TH, Hooper L, Gao Y, Zayegh A, Ijaz S, et al. Interventions for preventing  
380 obesity in children. *Cochrane Database Syst Rev*. 2019;7(7):Cd001871. Epub 2019/07/25. doi:  
381 10.1002/14651858.CD001871.pub4. PubMed PMID: 31332776; PubMed Central PMCID: PMC6646867  
382 interest to report  Lee Hooper: no conflicts of interest to report  Yang Gao: no conflicts of interest to  
383 report  Amir Zayegh: no conflicts of interest to report  Sharea Ijaz: no conflicts of interest to report   
384 Sophie Foxen: no conflicts of interest to report  Lucia Magee: no conflicts of interest to report  Claire  
385 O'Malley: no conflicts of interest to report  Carolyn Summerbell: no conflicts of interest to report   
386 Martha Elwenspoek: no conflicts of interest to report.
- 387 10. Clements R. An Investigation of the Status of Outdoor Play. *Contemporary Issues in Early*  
388 *Childhood*. 2004;5(1):68-80. doi: 10.2304/ciec.2004.5.1.10.
- 389 11. Fyfe-Johnson AL, Hazlehurst MF, Perrins SP, Bratman GN, Thomas R, Garrett KA, et al. Nature  
390 and Children's Health: A Systematic Review. *Pediatrics*. 2021;148(4). Epub 2021/10/01. doi:  
391 10.1542/peds.2020-049155. PubMed PMID: 34588297.
- 392 12. Ansari A, Pettit K, Gershoff E. Combating Obesity in Head Start: Outdoor Play and Change in  
393 Children's Body Mass Index. *J Dev Behav Pediatr*. 2015;36(8):605-12. Epub 2015/09/16. doi:  
394 10.1097/dbp.000000000000215. PubMed PMID: 26372047; PubMed Central PMCID: PMC4571181.
- 395 13. Zhang Y, Zhang X, Li J, Zhong H, Pan CW. Associations of outdoor activity and screen time with  
396 adiposity: findings from rural Chinese adolescents with relatively low adiposity risks. *BMC Public Health*.  
397 2020;20(1):1769. Epub 2020/11/25. doi: 10.1186/s12889-020-09897-7. PubMed PMID: 33228624; PubMed  
398 Central PMCID: PMC7684968.



- 399 14. Söderström M, Boldemann C, Sahlin U, Mårtensson F, Raustorp A, Blennow M. The quality of  
400 the outdoor environment influences children's health -- a cross-sectional study of preschools. *Acta Paediatr.*  
401 2013;102(1):83-91. Epub 2012/10/06. doi: 10.1111/apa.12047. PubMed PMID: 23035750.
- 402 15. Armstrong B, Lim CS, Janicke DM. Park Density Impacts Weight Change in a Behavioral  
403 Intervention for Overweight Rural Youth. *Behavioral medicine (Washington, DC)*. 2015;41(3):123-30. doi:  
404 10.1080/08964289.2015.1029428. PubMed PMID: 26332930.
- 405 16. Ward S, Bélanger M, Donovan D, Carrier N. Systematic review of the relationship between  
406 childcare educators' practices and preschoolers' physical activity and eating behaviours. *Obes Rev.*  
407 2015;16(12):1055-70. Epub 2015/09/09. doi: 10.1111/obr.12315. PubMed PMID: 26345462.
- 408 17. MN Christoffersen, Højen-Sørensen AKH, Laugesen L. Danish title: Daginstitutionens  
409 betydning for børns udvikling – en forskningsoversigt. English translation: The significance of the day care  
410 institution for children's development - a research overview. SFI Det nationale Forskningscenter for velfærd.  
411 2014.
- 412 18. Rohde JF, Larsen SC, Sederberg M, Bahrenscheer A, Nielsen A, Heitmann BL, et al. Outdoor  
413 kindergartens: A structural way to improve early physical activity behaviour? Manuscript submitted.
- 414 19. Nysom K, Mølgaard C, Hutchings B, Michaelsen KF. Body mass index of 0 to 45-y-old Danes:  
415 reference values and comparison with published European reference values. *Int J Obes Relat Metab Disord.*  
416 2001;25(2):177-84. Epub 2001/06/19. doi: 10.1038/sj.ijo.0801515. PubMed PMID: 11410817.
- 417 20. Norton EC, Miller MM, Kleinman LC. Computing adjusted risk ratios and risk differences in  
418 Stata. *Stata Journal*. 2013;13(3):492-509.
- 419 21. Frederick CB, Snellman K, Putnam RD. Increasing socioeconomic disparities in adolescent  
420 obesity. *Proc Natl Acad Sci U S A*. 2014;111(4):1338-42. Epub 2014/01/30. doi: 10.1073/pnas.1321355110.  
421 PubMed PMID: 24474757; PubMed Central PMCID: PMC3910644.
- 422 22. Specht IO, Larsen SC, Nielsen A, J.F. R, B.L. H, T.S. J. Parental choice of kindergarten type and  
423 relations to personal values, socio-demographics, and early child characteristics, 22 June 2022, PREPRINT  
424 (Version 1) available at Research Square [<https://doi.org/10.21203/rs.3.rs-1733639/v1>].
- 425 23. Wells NM, Evans GW. Nearby Nature: A Buffer of Life Stress among Rural Children.  
426 *Environment and Behavior*. 2003;35(3):311-30. doi: 10.1177/0013916503035003001.

427

428

429

430

A)

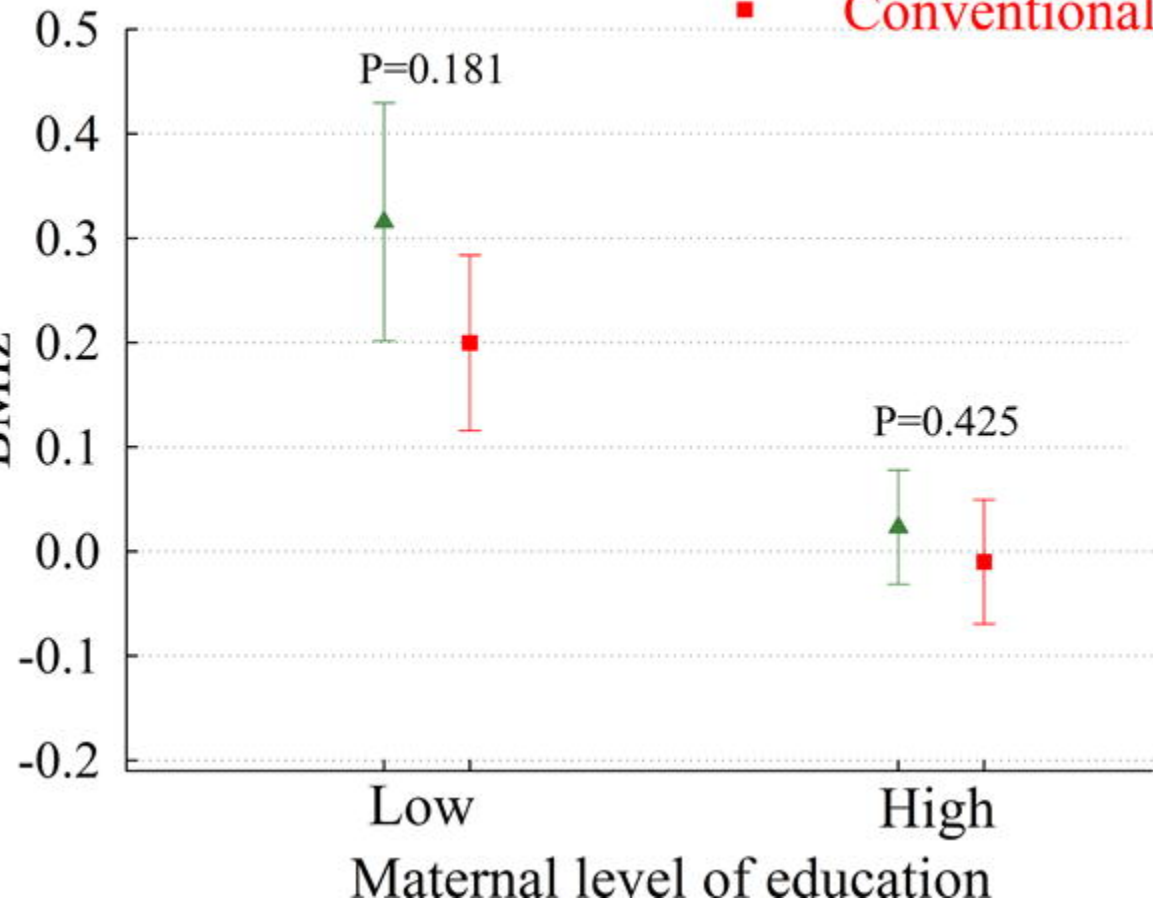

B)

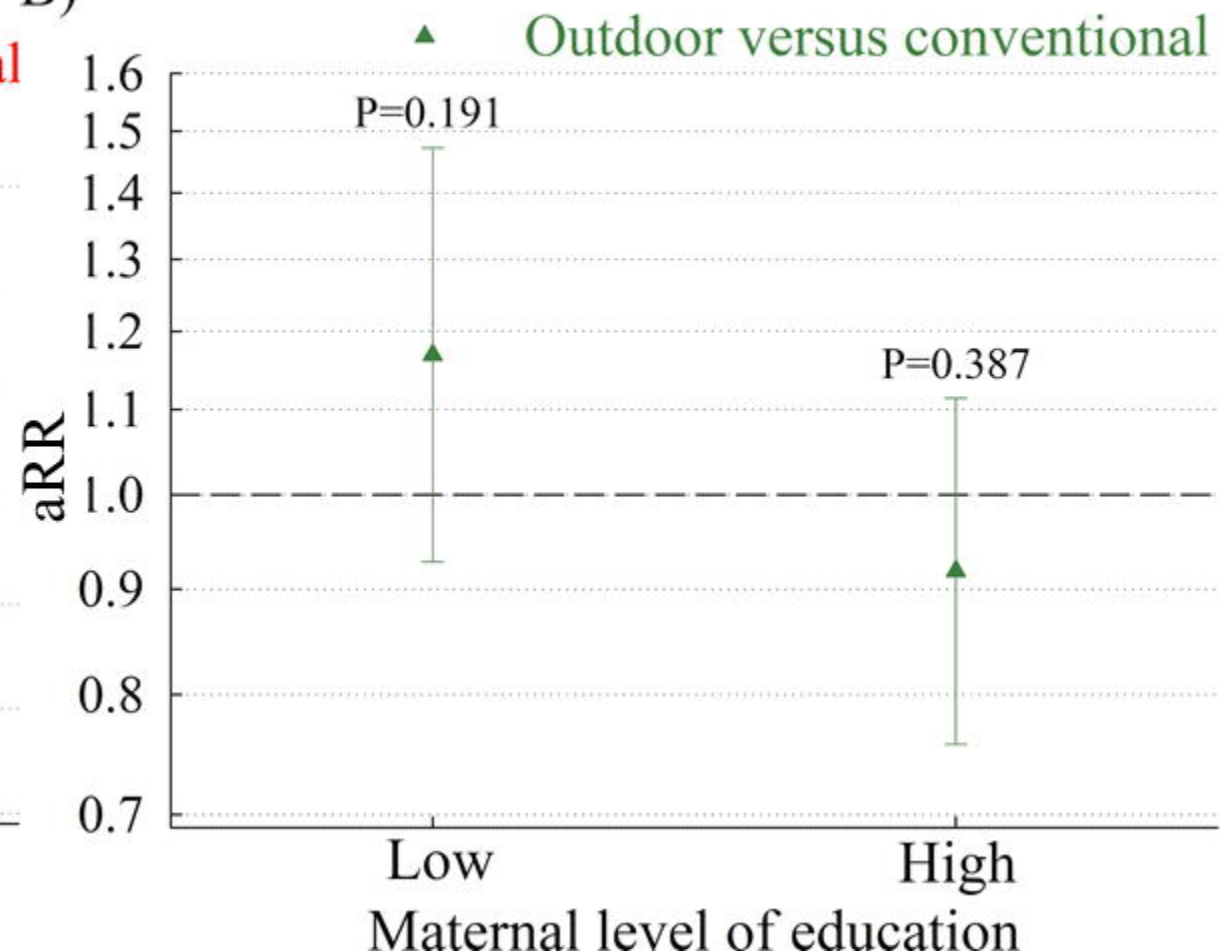

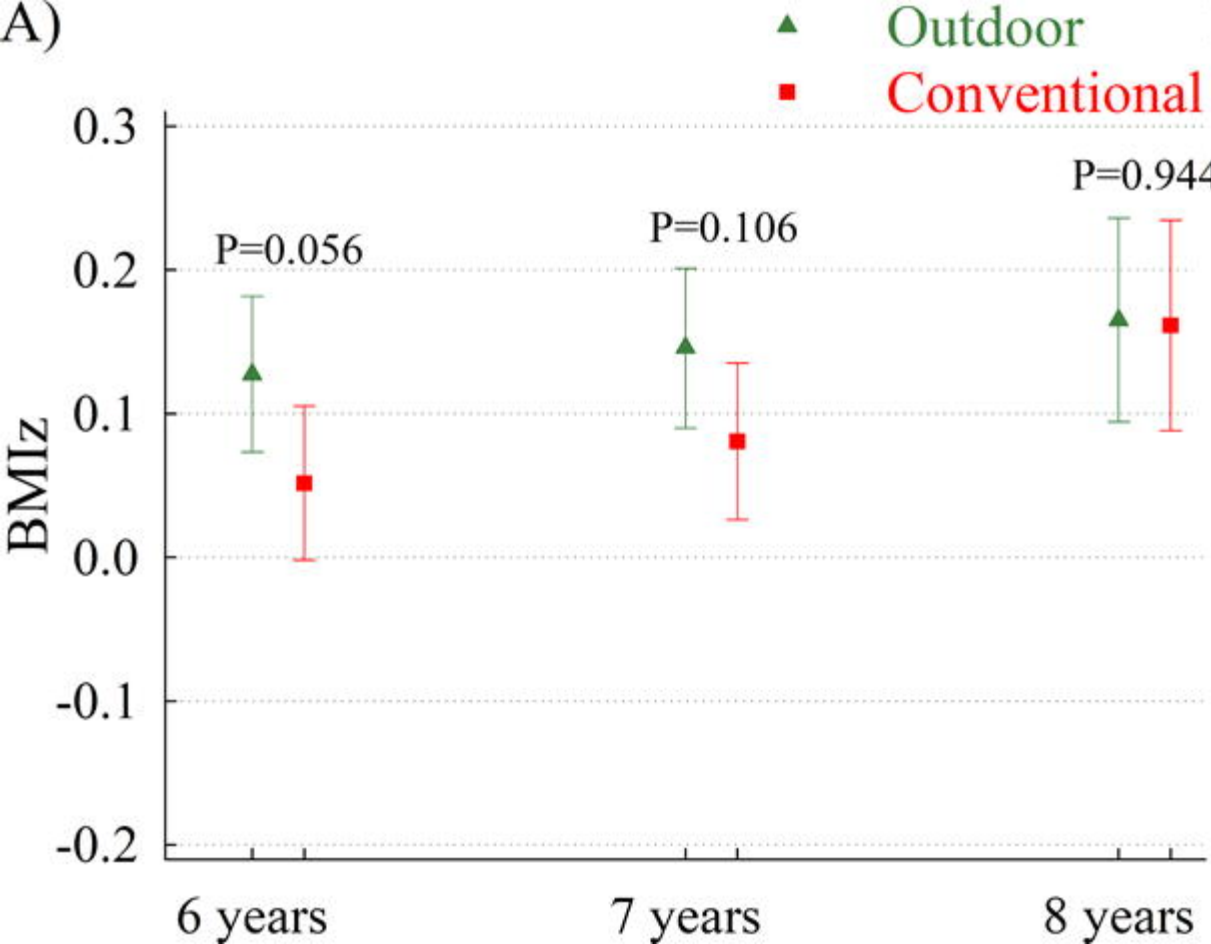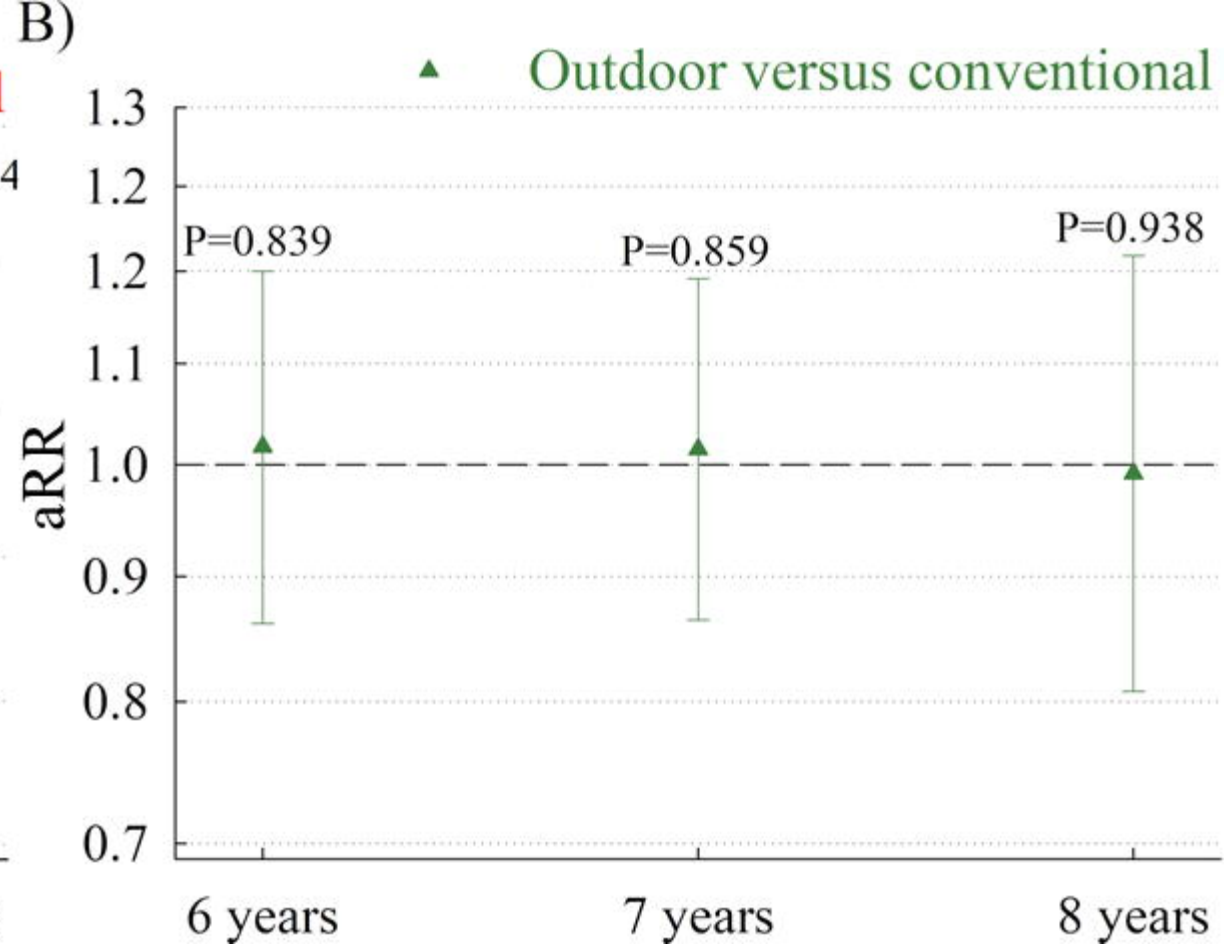

Source: https://www.medrxiv.org/content/10.1101/2022.10.03.22280495v1.full.pdf
